# Supplementary material for: The Story of a Hitchhiker: Population Genetic Patterns in the Invasive Barnacle Balanus(Amphibalanus) improvisus Darwin 1854
Source: PubMed Central journal article supplement (PMC4731558; doi:10.1371/journal.pone.0147082), 2016-01-28
Supplement: pone.0147082.s009.pdf [file pone.0147082.s009.pdf]

**S3 Table continued. Haplotype list with frequencies in all sampled populations of *B. improvisus*.**

| Haplotype/Population<br>continued... | PU |   | CB |   | NC |    | AR |        | FR     |    | SA     |    | KL |    | TO |    | ES |   | OR |   | UM |      | BL     |        | CS     |   | JP |   | N/hapl |
|--------------------------------------|----|---|----|---|----|----|----|--------|--------|----|--------|----|----|----|----|----|----|---|----|---|----|------|--------|--------|--------|---|----|---|--------|
|                                      | 42 | 7 | 7  | 7 | 30 | 29 | 29 | 49     | 30     | 29 | 30     | 57 | 50 | 26 | 30 | 32 |    |   |    |   |    |      |        |        |        |   |    |   |        |
| BH1070                               | 0  | 0 | 0  | 0 | 0  | 0  | 0  | 0.0204 | 0      | 0  | 0      | 0  | 0  | 0  | 0  | 0  | 0  | 0 | 0  | 0 | 0  | 0    | 0      | 0      | 0      | 0 | 0  | 1 |        |
| BH1071                               | 0  | 0 | 0  | 0 | 0  | 0  | 0  | 0.0204 | 0      | 0  | 0      | 0  | 0  | 0  | 0  | 0  | 0  | 0 | 0  | 0 | 0  | 0    | 0      | 0      | 0      | 0 | 0  | 1 |        |
| BH1072                               | 0  | 0 | 0  | 0 | 0  | 0  | 0  | 0.0204 | 0      | 0  | 0      | 0  | 0  | 0  | 0  | 0  | 0  | 0 | 0  | 0 | 0  | 0    | 0      | 0      | 0      | 0 | 0  | 1 |        |
| BH1073                               | 0  | 0 | 0  | 0 | 0  | 0  | 0  | 0.0204 | 0      | 0  | 0      | 0  | 0  | 0  | 0  | 0  | 0  | 0 | 0  | 0 | 0  | 0    | 0      | 0      | 0      | 0 | 0  | 1 |        |
| BH1074                               | 0  | 0 | 0  | 0 | 0  | 0  | 0  | 0.0204 | 0      | 0  | 0      | 0  | 0  | 0  | 0  | 0  | 0  | 0 | 0  | 0 | 0  | 0    | 0      | 0      | 0      | 0 | 0  | 1 |        |
| BH1075                               | 0  | 0 | 0  | 0 | 0  | 0  | 0  | 0.0333 | 0      | 0  | 0.0333 | 0  | 0  | 0  | 0  | 0  | 0  | 0 | 0  | 0 | 0  | 0.02 | 0      | 0      | 0      | 0 | 0  | 2 |        |
| BH1076                               | 0  | 0 | 0  | 0 | 0  | 0  | 0  | 0.0333 | 0      | 0  | 0.0333 | 0  | 0  | 0  | 0  | 0  | 0  | 0 | 0  | 0 | 0  | 0    | 0      | 0      | 0      | 0 | 0  | 1 |        |
| BH1077                               | 0  | 0 | 0  | 0 | 0  | 0  | 0  | 0.0333 | 0      | 0  | 0.0333 | 0  | 0  | 0  | 0  | 0  | 0  | 0 | 0  | 0 | 0  | 0    | 0      | 0      | 0      | 0 | 0  | 1 |        |
| BH1078                               | 0  | 0 | 0  | 0 | 0  | 0  | 0  | 0.0333 | 0      | 0  | 0.0333 | 0  | 0  | 0  | 0  | 0  | 0  | 0 | 0  | 0 | 0  | 0    | 0      | 0      | 0      | 0 | 0  | 1 |        |
| BH1079                               | 0  | 0 | 0  | 0 | 0  | 0  | 0  | 0.0333 | 0      | 0  | 0.0333 | 0  | 0  | 0  | 0  | 0  | 0  | 0 | 0  | 0 | 0  | 0    | 0      | 0      | 0      | 0 | 0  | 1 |        |
| BH1080                               | 0  | 0 | 0  | 0 | 0  | 0  | 0  | 0.0333 | 0      | 0  | 0.0333 | 0  | 0  | 0  | 0  | 0  | 0  | 0 | 0  | 0 | 0  | 0    | 0      | 0      | 0      | 0 | 0  | 1 |        |
| BH1081                               | 0  | 0 | 0  | 0 | 0  | 0  | 0  | 0.0333 | 0      | 0  | 0.0333 | 0  | 0  | 0  | 0  | 0  | 0  | 0 | 0  | 0 | 0  | 0    | 0      | 0      | 0      | 0 | 0  | 1 |        |
| BH1082                               | 0  | 0 | 0  | 0 | 0  | 0  | 0  | 0.0345 | 0      | 0  | 0.0345 | 0  | 0  | 0  | 0  | 0  | 0  | 0 | 0  | 0 | 0  | 0    | 0      | 0      | 0      | 0 | 0  | 2 |        |
| BH1083                               | 0  | 0 | 0  | 0 | 0  | 0  | 0  | 0.0345 | 0      | 0  | 0.0345 | 0  | 0  | 0  | 0  | 0  | 0  | 0 | 0  | 0 | 0  | 0    | 0      | 0      | 0      | 0 | 0  | 2 |        |
| BH1084                               | 0  | 0 | 0  | 0 | 0  | 0  | 0  | 0.0345 | 0      | 0  | 0.0345 | 0  | 0  | 0  | 0  | 0  | 0  | 0 | 0  | 0 | 0  | 0    | 0      | 0      | 0      | 0 | 0  | 2 |        |
| BH1085                               | 0  | 0 | 0  | 0 | 0  | 0  | 0  | 0.0345 | 0      | 0  | 0.0345 | 0  | 0  | 0  | 0  | 0  | 0  | 0 | 0  | 0 | 0  | 0    | 0      | 0.0333 | 0      | 0 | 0  | 2 |        |
| BH1086                               | 0  | 0 | 0  | 0 | 0  | 0  | 0  | 0.0345 | 0      | 0  | 0.0345 | 0  | 0  | 0  | 0  | 0  | 0  | 0 | 0  | 0 | 0  | 0    | 0      | 0      | 0      | 0 | 0  | 1 |        |
| BH1087                               | 0  | 0 | 0  | 0 | 0  | 0  | 0  | 0.0345 | 0      | 0  | 0.0345 | 0  | 0  | 0  | 0  | 0  | 0  | 0 | 0  | 0 | 0  | 0    | 0      | 0      | 0      | 0 | 0  | 1 |        |
| BH1088                               | 0  | 0 | 0  | 0 | 0  | 0  | 0  | 0.0345 | 0      | 0  | 0.0345 | 0  | 0  | 0  | 0  | 0  | 0  | 0 | 0  | 0 | 0  | 0    | 0      | 0      | 0      | 0 | 0  | 1 |        |
| BH1089                               | 0  | 0 | 0  | 0 | 0  | 0  | 0  | 0.0345 | 0      | 0  | 0.0345 | 0  | 0  | 0  | 0  | 0  | 0  | 0 | 0  | 0 | 0  | 0    | 0      | 0      | 0      | 0 | 0  | 1 |        |
| BH1090                               | 0  | 0 | 0  | 0 | 0  | 0  | 0  | 0.0345 | 0      | 0  | 0.0345 | 0  | 0  | 0  | 0  | 0  | 0  | 0 | 0  | 0 | 0  | 0    | 0      | 0      | 0      | 0 | 0  | 1 |        |
| BH1091                               | 0  | 0 | 0  | 0 | 0  | 0  | 0  | 0.0345 | 0      | 0  | 0.0345 | 0  | 0  | 0  | 0  | 0  | 0  | 0 | 0  | 0 | 0  | 0    | 0      | 0      | 0      | 0 | 0  | 1 |        |
| BH1092                               | 0  | 0 | 0  | 0 | 0  | 0  | 0  | 0.0345 | 0      | 0  | 0.0345 | 0  | 0  | 0  | 0  | 0  | 0  | 0 | 0  | 0 | 0  | 0    | 0      | 0      | 0      | 0 | 0  | 1 |        |
| BH1093                               | 0  | 0 | 0  | 0 | 0  | 0  | 0  | 0.0333 | 0      | 0  | 0.0333 | 0  | 0  | 0  | 0  | 0  | 0  | 0 | 0  | 0 | 0  | 0    | 0.0333 | 0.0312 | 0      | 0 | 0  | 3 |        |
| BH1094                               | 0  | 0 | 0  | 0 | 0  | 0  | 0  | 0.0333 | 0      | 0  | 0.0333 | 0  | 0  | 0  | 0  | 0  | 0  | 0 | 0  | 0 | 0  | 0.02 | 0      | 0      | 0      | 0 | 0  | 1 |        |
| BH1095                               | 0  | 0 | 0  | 0 | 0  | 0  | 0  | 0.0333 | 0.0175 | 0  | 0      | 0  | 0  | 0  | 0  | 0  | 0  | 0 | 0  | 0 | 0  | 0    | 0      | 0      | 0      | 0 | 0  | 2 |        |
| BH1096                               | 0  | 0 | 0  | 0 | 0  | 0  | 0  | 0.0333 | 0      | 0  | 0.0333 | 0  | 0  | 0  | 0  | 0  | 0  | 0 | 0  | 0 | 0  | 0    | 0      | 0      | 0.0312 | 0 | 0  | 2 |        |
| BH1097                               | 0  | 0 | 0  | 0 | 0  | 0  | 0  | 0.0333 | 0      | 0  | 0.0333 | 0  | 0  | 0  | 0  | 0  | 0  | 0 | 0  | 0 | 0  | 0    | 0      | 0      | 0      | 0 | 0  | 1 |        |
| BH1098                               | 0  | 0 | 0  | 0 | 0  | 0  | 0  | 0.0333 | 0      | 0  | 0.0333 | 0  | 0  | 0  | 0  | 0  | 0  | 0 | 0  | 0 | 0  | 0    | 0      | 0      | 0      | 0 | 0  | 1 |        |
| BH1099                               | 0  | 0 | 0  | 0 | 0  | 0  | 0  | 0.0333 | 0      | 0  | 0.0333 | 0  | 0  | 0  | 0  | 0  | 0  | 0 | 0  | 0 | 0  | 0    | 0      | 0      | 0      | 0 | 0  | 1 |        |
| BH1100                               | 0  | 0 | 0  | 0 | 0  | 0  | 0  | 0.0333 | 0      | 0  | 0.0333 | 0  | 0  | 0  | 0  | 0  | 0  | 0 | 0  | 0 | 0  | 0    | 0      | 0      | 0      | 0 | 0  | 1 |        |
| BH1101                               | 0  | 0 | 0  | 0 | 0  | 0  | 0  | 0.0333 | 0      | 0  | 0.0333 | 0  | 0  | 0  | 0  | 0  | 0  | 0 | 0  | 0 | 0  | 0    | 0      | 0      | 0      | 0 | 0  | 1 |        |
| BH1102                               | 0  | 0 | 0  | 0 | 0  | 0  | 0  | 0.0333 | 0      | 0  | 0.0333 | 0  | 0  | 0  | 0  | 0  | 0  | 0 | 0  | 0 | 0  | 0    | 0      | 0      | 0      | 0 | 0  | 1 |        |
| BH1103                               | 0  | 0 | 0  | 0 | 0  | 0  | 0  | 0.0333 | 0      | 0  | 0.0333 | 0  | 0  | 0  | 0  | 0  | 0  | 0 | 0  | 0 | 0  | 0    | 0      | 0      | 0      | 0 | 0  | 1 |        |
| BH1104                               | 0  | 0 | 0  | 0 | 0  | 0  | 0  | 0.0333 | 0      | 0  | 0.0333 | 0  | 0  | 0  | 0  | 0  | 0  | 0 | 0  | 0 | 0  | 0    | 0      | 0      | 0      | 0 | 0  | 1 |        |
| BH1105                               | 0  | 0 | 0  | 0 | 0  | 0  | 0  | 0.0175 | 0      | 0  | 0.0175 | 0  | 0  | 0  | 0  | 0  | 0  | 0 | 0  | 0 | 0  | 0.02 | 0      | 0      | 0      | 0 | 0  | 2 |        |
| BH1106                               | 0  | 0 | 0  | 0 | 0  | 0  | 0  | 0.0175 | 0      | 0  | 0.0175 | 0  | 0  | 0  | 0  | 0  | 0  | 0 | 0  | 0 | 0  | 0.02 | 0      | 0      | 0      | 0 | 0  | 2 |        |
| BH1107                               | 0  | 0 | 0  | 0 | 0  | 0  | 0  | 0.0175 | 0      | 0  | 0.0175 | 0  | 0  | 0  | 0  | 0  | 0  | 0 | 0  | 0 | 0  | 0    | 0      | 0.0312 | 0      | 0 | 0  | 2 |        |
| BH1108                               | 0  | 0 | 0  | 0 | 0  | 0  | 0  | 0.0175 | 0      | 0  | 0.0175 | 0  | 0  | 0  | 0  | 0  | 0  | 0 | 0  | 0 | 0  | 0    | 0      | 0      | 0      | 0 | 0  | 1 |        |
| BH1109                               | 0  | 0 | 0  | 0 | 0  | 0  | 0  | 0.0175 | 0      | 0  | 0.0175 | 0  | 0  | 0  | 0  | 0  | 0  | 0 | 0  | 0 | 0  | 0    | 0      | 0      | 0      | 0 | 0  | 1 |        |
| BH1110                               | 0  | 0 | 0  | 0 | 0  | 0  | 0  | 0.0175 | 0      | 0  | 0.0175 | 0  | 0  | 0  | 0  | 0  | 0  | 0 | 0  | 0 | 0  | 0    | 0      | 0      | 0      | 0 | 0  | 1 |        |
| BH1111                               | 0  | 0 | 0  | 0 | 0  | 0  | 0  | 0.0175 | 0      | 0  | 0.0175 | 0  | 0  | 0  | 0  | 0  | 0  | 0 | 0  | 0 | 0  | 0    | 0      | 0      | 0      | 0 | 0  | 1 |        |
| BH1112                               | 0  | 0 | 0  | 0 | 0  | 0  | 0  | 0.0175 | 0      | 0  | 0.0175 | 0  | 0  | 0  | 0  | 0  | 0  | 0 | 0  | 0 | 0  | 0    | 0      | 0      | 0      | 0 | 0  | 1 |        |
| BH1113                               | 0  | 0 | 0  | 0 | 0  | 0  | 0  | 0.0175 | 0      | 0  | 0.0175 | 0  | 0  | 0  | 0  | 0  | 0  | 0 | 0  | 0 | 0  | 0    | 0      | 0      | 0      | 0 | 0  | 1 |        |
| BH1114                               | 0  | 0 | 0  | 0 | 0  | 0  | 0  | 0.0175 | 0      | 0  | 0.0175 | 0  | 0  | 0  | 0  | 0  | 0  | 0 | 0  | 0 | 0  | 0    | 0      | 0      | 0      | 0 | 0  | 1 |        |
| BH1115                               | 0  | 0 | 0  | 0 | 0  | 0  | 0  | 0.0175 | 0      | 0  | 0.0175 | 0  | 0  | 0  | 0  | 0  | 0  | 0 | 0  | 0 | 0  | 0.02 | 0      | 0      | 0      | 0 | 0  | 1 |        |
| BH1116                               | 0  | 0 | 0  | 0 | 0  | 0  | 0  | 0.02   | 0      | 0  | 0.02   | 0  | 0  | 0  | 0  | 0  | 0  | 0 | 0  | 0 | 0  | 0.02 | 0      | 0      | 0      | 0 | 0  | 1 |        |
| BH1117                               | 0  | 0 | 0  | 0 | 0  | 0  | 0  | 0.02   | 0      | 0  | 0.02   | 0  | 0  | 0  | 0  | 0  | 0  | 0 | 0  | 0 | 0  | 0.02 | 0      | 0      | 0      | 0 | 0  | 1 |        |
| BH1118                               | 0  | 0 | 0  | 0 | 0  | 0  | 0  | 0.02   | 0      | 0  | 0.02   | 0  | 0  | 0  | 0  | 0  | 0  | 0 | 0  | 0 | 0  | 0.02 | 0      | 0      | 0      | 0 | 0  | 1 |        |
| BH1119                               | 0  | 0 | 0  | 0 | 0  | 0  | 0  | 0.02   | 0      | 0  | 0.02   | 0  | 0  | 0  | 0  | 0  | 0  | 0 | 0  | 0 | 0  | 0.02 | 0      | 0      | 0      | 0 | 0  | 1 |        |
| BH1120                               | 0  | 0 | 0  | 0 | 0  | 0  | 0  | 0.02   | 0      | 0  | 0.02   | 0  | 0  | 0  | 0  | 0  | 0  | 0 | 0  | 0 | 0  | 0.02 | 0      | 0      | 0      | 0 | 0  | 1 |        |
| BH1121                               | 0  | 0 | 0  | 0 | 0  | 0  | 0  | 0.02   | 0      | 0  | 0.02   | 0  | 0  | 0  | 0  | 0  | 0  | 0 | 0  | 0 | 0  | 0.02 | 0      | 0      | 0      | 0 | 0  | 1 |        |
| BH1122                               | 0  | 0 | 0  | 0 | 0  | 0  | 0  | 0.02   | 0      | 0  | 0.02   | 0  | 0  | 0  | 0  | 0  | 0  | 0 | 0  | 0 | 0  | 0.02 | 0      | 0      | 0      | 0 | 0  | 1 |        |
| BH1123                               | 0  | 0 | 0  | 0 | 0  | 0  | 0  | 0.02   | 0      | 0  | 0.02   | 0  | 0  | 0  | 0  | 0  | 0  | 0 | 0  | 0 | 0  | 0.02 | 0      | 0      | 0      | 0 | 0  | 1 |        |
| BH1124                               | 0  | 0 | 0  | 0 | 0  | 0  | 0  | 0.02   | 0      | 0  | 0.02   | 0  | 0  | 0  | 0  | 0  | 0  | 0 | 0  | 0 | 0  | 0.02 | 0      | 0      | 0      | 0 | 0  | 1 |        |
| BH1125                               | 0  | 0 | 0  | 0 | 0  | 0  | 0  | 0.02   | 0      | 0  | 0.02   | 0  | 0  | 0  | 0  | 0  | 0  | 0 | 0  | 0 | 0  | 0.02 | 0      | 0      | 0      | 0 | 0  | 1 |        |
| BH1126                               | 0  | 0 | 0  | 0 | 0  | 0  | 0  | 0.0769 | 0      | 0  | 0.0769 | 0  | 0  | 0  | 0  | 0  | 0  | 0 | 0  | 0 | 0  | 0    | 0      | 0      | 0      | 0 | 0  | 2 |        |
| BH1127                               | 0  | 0 | 0  | 0 | 0  | 0  | 0  | 0.0769 | 0      | 0  | 0.0769 | 0  | 0  | 0  | 0  | 0  | 0  | 0 | 0  | 0 | 0  | 0    | 0      | 0      | 0      | 0 | 0  | 2 |        |
| BH1128                               | 0  | 0 | 0  | 0 | 0  | 0  | 0  | 0.0333 | 0      | 0  | 0.0333 | 0  | 0  | 0  | 0  | 0  | 0  | 0 | 0  | 0 | 0  | 0    | 0      | 0.0333 | 0      | 0 | 0  | 1 |        |
| BH1129                               | 0  | 0 | 0  | 0 | 0  | 0  | 0  | 0.0333 | 0      | 0  | 0.0333 | 0  | 0  | 0  | 0  | 0  | 0  | 0 | 0  | 0 | 0  | 0    | 0      | 0.0333 | 0      | 0 | 0  | 1 |        |
| BH1130                               | 0  | 0 | 0  | 0 | 0  | 0  | 0  | 0.0333 | 0      | 0  | 0.0333 | 0  | 0  | 0  | 0  | 0  | 0  | 0 | 0  | 0 | 0  | 0    | 0      | 0.0333 | 0      | 0 | 0  | 1 |        |
| BH1131                               | 0  | 0 | 0  | 0 | 0  | 0  | 0  | 0.0333 | 0      | 0  | 0.0333 | 0  | 0  | 0  | 0  | 0  |    |   |    |   |    |      |        |        |        |   |    |   |        |
